# Supplementary material
Source: Elsevier journal article supplement (https://www.sciencedirect.com/science/article/pii/S0300893220301639)

## SUPPLEMENTARY DATA

**Figure 1 of the supplementary data.** Flow-chart of patients' selection for this study.

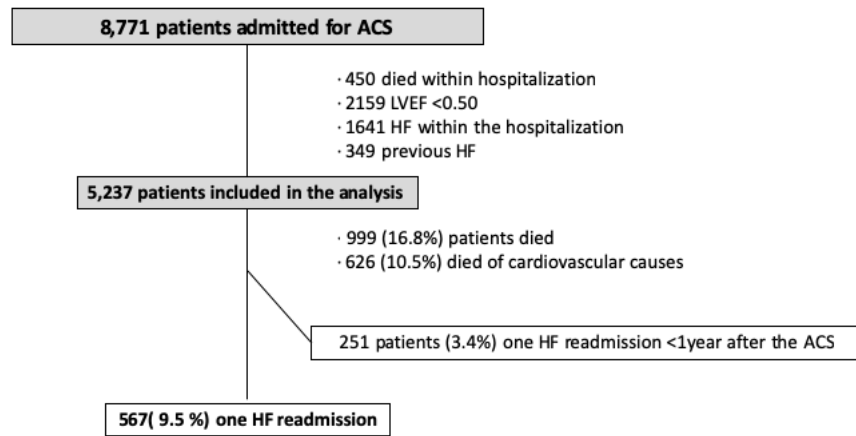

**Figure 2 of the supplementary data.** Receiver operator curves for the diagnostic accuracy of the CardioCHUS-SanJuan HF score for heart failure readmission

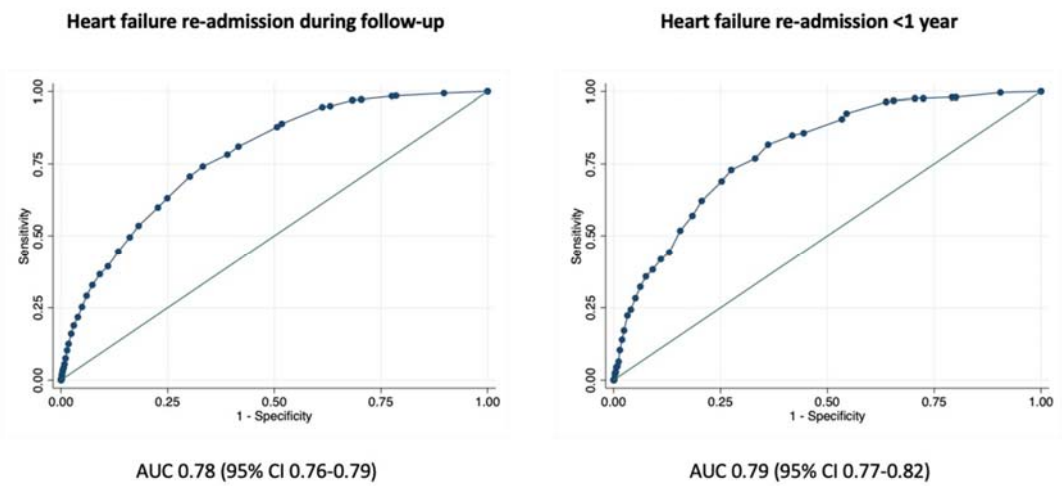

Supplement: mmc1 [file S0300893220301639:mmc1.pdf]
